# Supplementary material
Source: PubMed Central journal article supplement (PMC8906793)
Supplement: ivaa238_supplementary_data.pdf [file ivaa238_supplementary_data.pdf]

**Supplementary Figure 1. Initial imaging.**

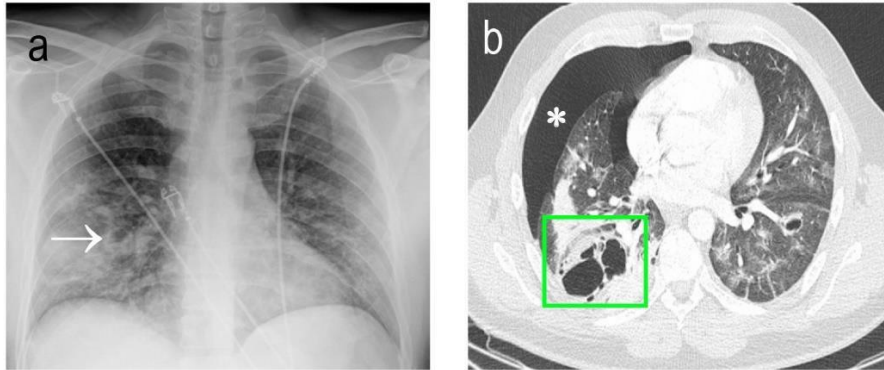

**Supplementary Figure 1. Initial imaging. S1a.** CXR on 4/21/2020 demonstrating basilar predominant bilateral airspace disease (right greater than left) consistent with viral pneumonia. Cavitory change is apparent on the right (arrow). Note, no pneumothorax is present. **S1b.** Axial section of CTA chest on 4/22/2020 demonstrating large right pneumothorax (asterisk) and a RLL cavitory lesion (green box).

**Supplementary Figure 2. Catheter thoracostomy treatment.**

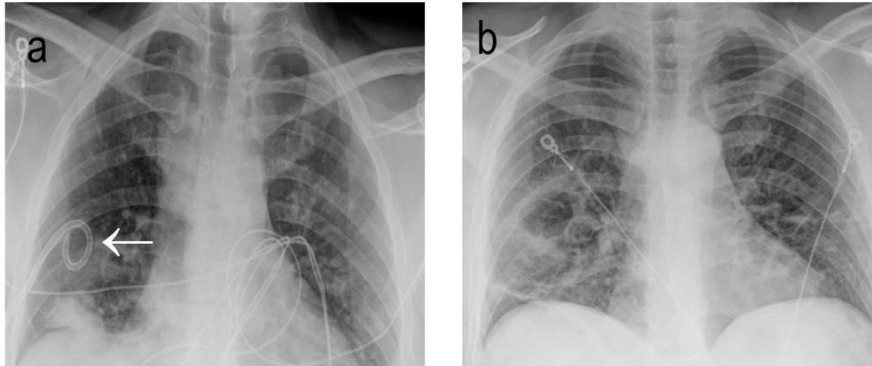

**Supplementary Figure 2. Catheter thoracostomy treatment. S2a.** Resolution of PTX with 14 Fr. Pigtail catheter thoracostomy (arrow). **S2b.** CXR demonstrating well-expanded right lung after thoracostomy tube removal.

**Supplementary Figure 3. RUL cavitory lesion.**

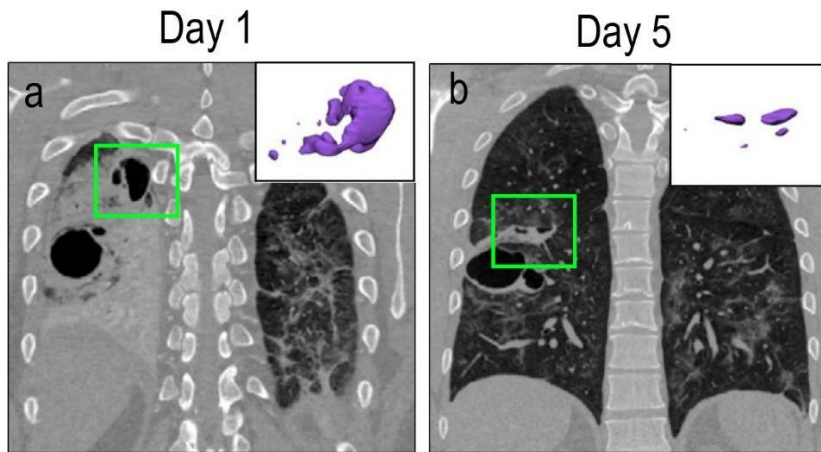

**Supplementary Figure 3. RUL cavitory lesion. S3a.** Coronal section of CTA chest 4/22/2020 (Day 1) demonstrating a complex RUL cavitory lesion (green box, 3D model inset). **S3b.** Coronal section of CTA chest on 4/27/2020 (Day 5) demonstrating decreased size of the RUL cavity (green box) and corresponding 3D model of the cavity (purple, inset).

Supplementary Figure 4. Interval CT imaging, Day 54.

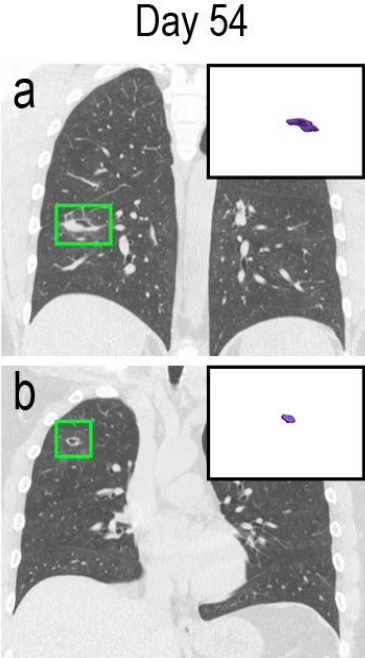

**Supplementary Figure 4. 4a.** CT thorax Day 54: Ongoing resolution of RLL cavity. **4b.** CT thorax Day 54: Small RUL cavity and 3D model. Note: Green boxes indicate cavities. 3D models (purple) are scaled for comparison between panels.

## Supplementary Figure 5. Pulmonary Function Testing

| Pulmonary Function Parameters Measured |       |       |          |       |
|----------------------------------------|-------|-------|----------|-------|
|                                        | LLN   | Pred  | Baseline | %Pred |
| FVC                                    | 4.89  | 6.10  | 5.49     | 90    |
| FEV1                                   | 3.90  | 4.91  | 4.56     | 93    |
| FEV1/FVC                               | 70    | 81    | 83       |       |
| PEF                                    | 8.58  | 11.17 | 10.22    | 91    |
| FEF 25/75                              | 2.84  | 4.73  | 4.48     | 95    |
| FET                                    |       |       | 8.46     |       |
| V backextrap.                          |       |       | 0.12     |       |
| SVQ                                    | 4.89  | 6.10  | 5.49     | 90    |
| IC                                     |       | 4.21  | 3.85     | 91    |
| ERV                                    |       | 1.62  | 1.64     | 101   |
| RV                                     | 1.33  | 2.00  | 1.70     | 85    |
| FRCpl                                  | 2.64  | 3.62  | 3.34     | 92    |
| TLC                                    | 6.79  | 7.94  | 7.18     | 91    |
| RV%TLC                                 | 19    | 28    | 24       | 86    |
| RAW .71-2.60                           |       |       | 2.38     |       |
| GAW .38-1.4                            |       |       | 0.42     |       |
| sGAW >.10                              |       |       | 0.13     |       |
| DLCO SB                                | 28.03 | 35.83 | 33.68    | 94    |
| DLVA                                   | 3.72  | 4.71  | 5.31     | 113   |
| VA SB                                  | 6.27  | 7.66  | 6.34     | 83    |
| IVC_SB                                 | 4.91  | 5.84  | 5.28     | 91    |

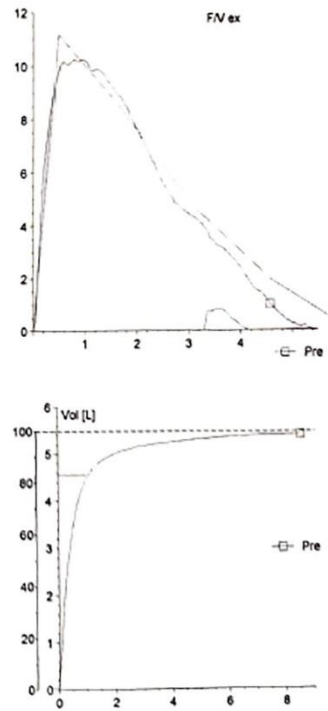

**Supplementary Figure 5. Pulmonary Function Testing.** Convalescent pulmonary function testing was obtained on June 16, 2020. There is no pulmonary function testing prior to the COVID-19 infection.

**Supplementary Table 1. Basic laboratory values**

| <b><u>Test</u></b>     | <b><u>Outcome</u></b>      |
|------------------------|----------------------------|
| White blood cell count | 8.6                        |
| Hemoglobin             | 15.7                       |
| Platelet count         | 268                        |
| Sodium                 | 139                        |
| Potassium              | 3.9                        |
| Blood urea nitrogen    | 14                         |
| Creatinine             | 1.01                       |
| Glucose                | 93                         |
| Magnesium              | 1.9                        |
| Phosphate              | 2.5                        |
| Lactate                | 2.1 (normal <2)            |
| Troponin               | 0.01 (normal <0.03 ng/mL)  |
| Procalcitonin          | 0.03 (normal <0.25 ng/mL)  |
| C-reactive protein     | 2.6 (normal 0.0-1.0 mg/dL) |

**Supplementary Table 1. Basic laboratory values.** Basic laboratory evaluation on April 22<sup>nd</sup>, 2020 was unremarkable. Notably, there was no leukocytosis and the procalcitonin was normal.

**Supplementary Table 2. Cavity Volumes**

| <b>Date of CT chest</b> | <b>Cavitary Lesion</b> | <b>Volume (mm<sup>3</sup>)</b> |
|-------------------------|------------------------|--------------------------------|
| 4/22/2020               | RLL                    | 20479                          |
| 4/22/2020               | RUL                    | 6816                           |
| 4/22/2020               | LLL                    | 402                            |
| 4/27/2020               | RLL                    | 30057                          |
| 4/27/2020               | RUL                    | 941                            |
| 4/27/2020               | LLL                    | 125                            |
| 5/27/2020               | RLL                    | 1618                           |
| 6/15/2020               | RLL                    | 135                            |
| 6/15/2020               | RUL                    | 34                             |

**Supplementary Table 2. Cavity volumes.** 3D models of the cavities were generated using Mimics; 3-matic; Materialise (Leuven, Belgium) software and cavity volumes (mm<sup>3</sup>) were measured.
